# Supplementary material
Source: Springer Nature journal article supplement (https://www.springermedizin.de/resource/supplementary/13002_2012_299_MOESM1_ESM.pdf/9627580)
Supplement: MOESM1 [file 9627580]

**DISCIPLINE OF PHARMACY  
SCHOOL OF MEDICINE & HEALTH SCIENCES  
UNIVERSITY OF PAPUA NEW GUINEA**

**INFORMATION SHEET  
ON  
TRADITIONAL HERBAL PREPARATIONS AND MEDICINAL PLANTS OF PAPUA  
NEW GUINEA**

*(One form should be completed for each plant or preparation)*

Date: .....

1. Family name of plant: .....
2. Genus & species: .....
3. Common English name: .....
4. Local name(s) (specify which dialect/language):  
.....  
.....  
.....
5. Herbarium specimen number and address of the herbarium where a specimen of this plant has been deposited:  
.....  
.....
6. Location of plant (i.e. which part of town/village/LLG): .....
7. Diseases, symptoms and conditions for which plant is used:  
.....  
.....  
.....  
.....  
(Be as specific as possible)
8. Plant parts used: .....
9. Method (s) of preparation for use (Provide details about amount of plant part required, whether fresh or dried, ratio of plant to solvent, etc.):  
.....  
.....  
.....  
.....

.....  
.....  
.....  
.....  
.....

10. The time of the day the plant material being used is collected; time of year and stage of development of plant (whether young, mature, etc):

.....  
.....

11. Methods of storage and processing (if any):

.....  
.....  
.....

12. Community's beliefs about the causes of disease, its symptoms and diagnosis, the stage at which the disease is treated, etc. (where appropriate).

.....  
.....  
.....  
.....

13. Adjunct therapy used (if any):

.....  
.....  
.....  
.....

14. Mode and method of administration (dosage/regimen):

.....  
.....  
.....  
.....  
.....  
.....  
.....  
.....

15. Are there any incantations needed? (Yes or No). If yes, write down the incantation below or at the back of the sheet.
